# Supplementary material
Source: MDPI journal article supplement (https://www.mdpi.com/2071-1050/13/6/3043)

Supplementary Figure S1a. Level 1 objective (see Figure 2) for international obligations and its subsidiary Levels 2–4 objectives.

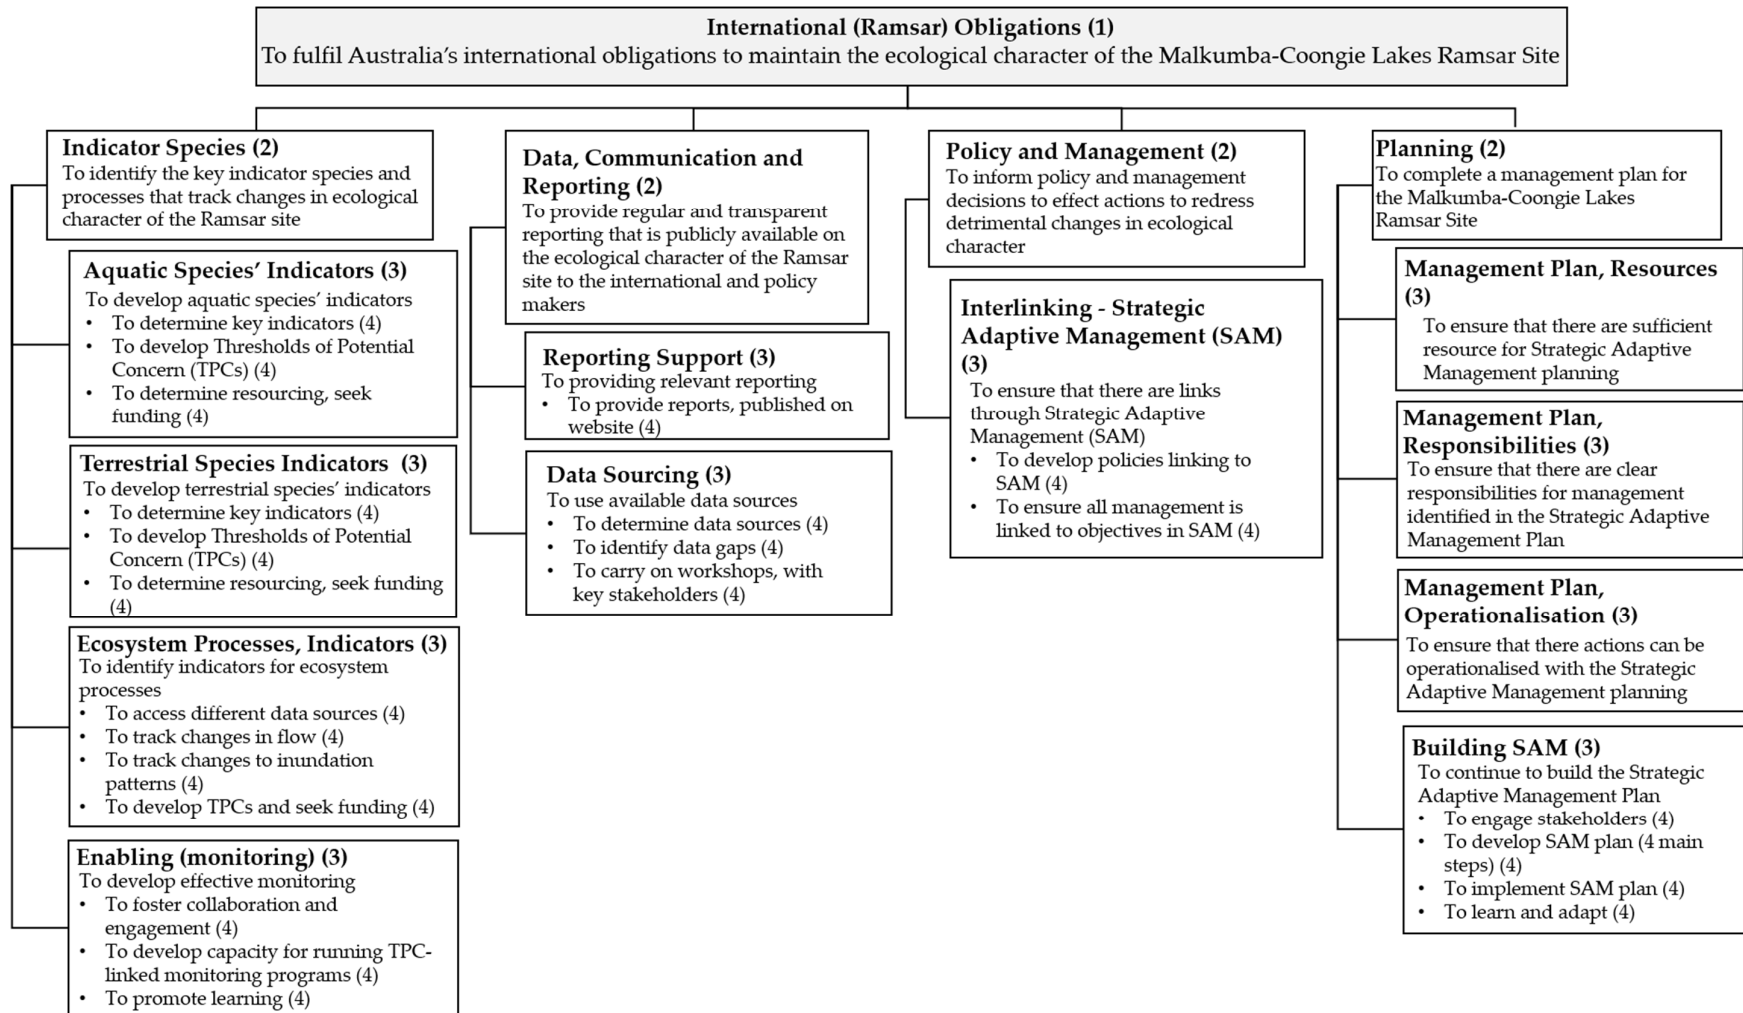

Supplementary Figure S1b. Level 1 objective (see Figure 2) for cultural heritage and its subsidiary Levels 2–4 objectives.

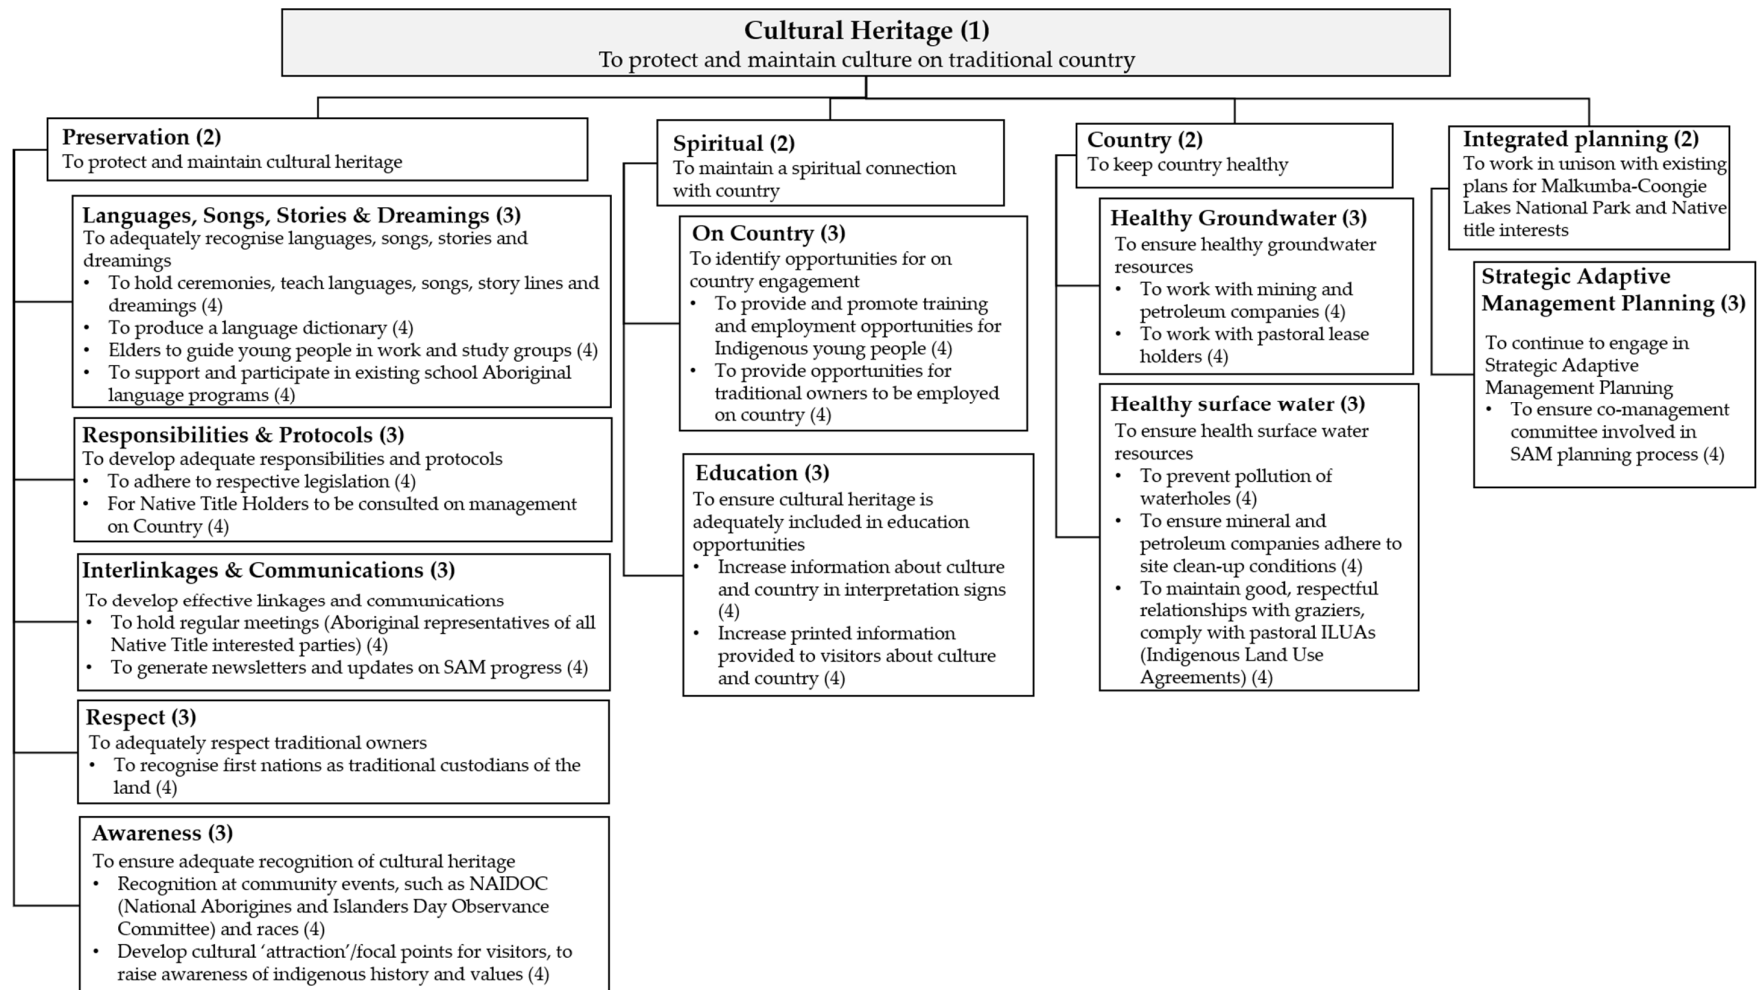

Supplementary Figure S1c. Level 1 objective (see Figure 2) for environmentally sustainable industries and its subsidiary Levels 2–4 objectives.

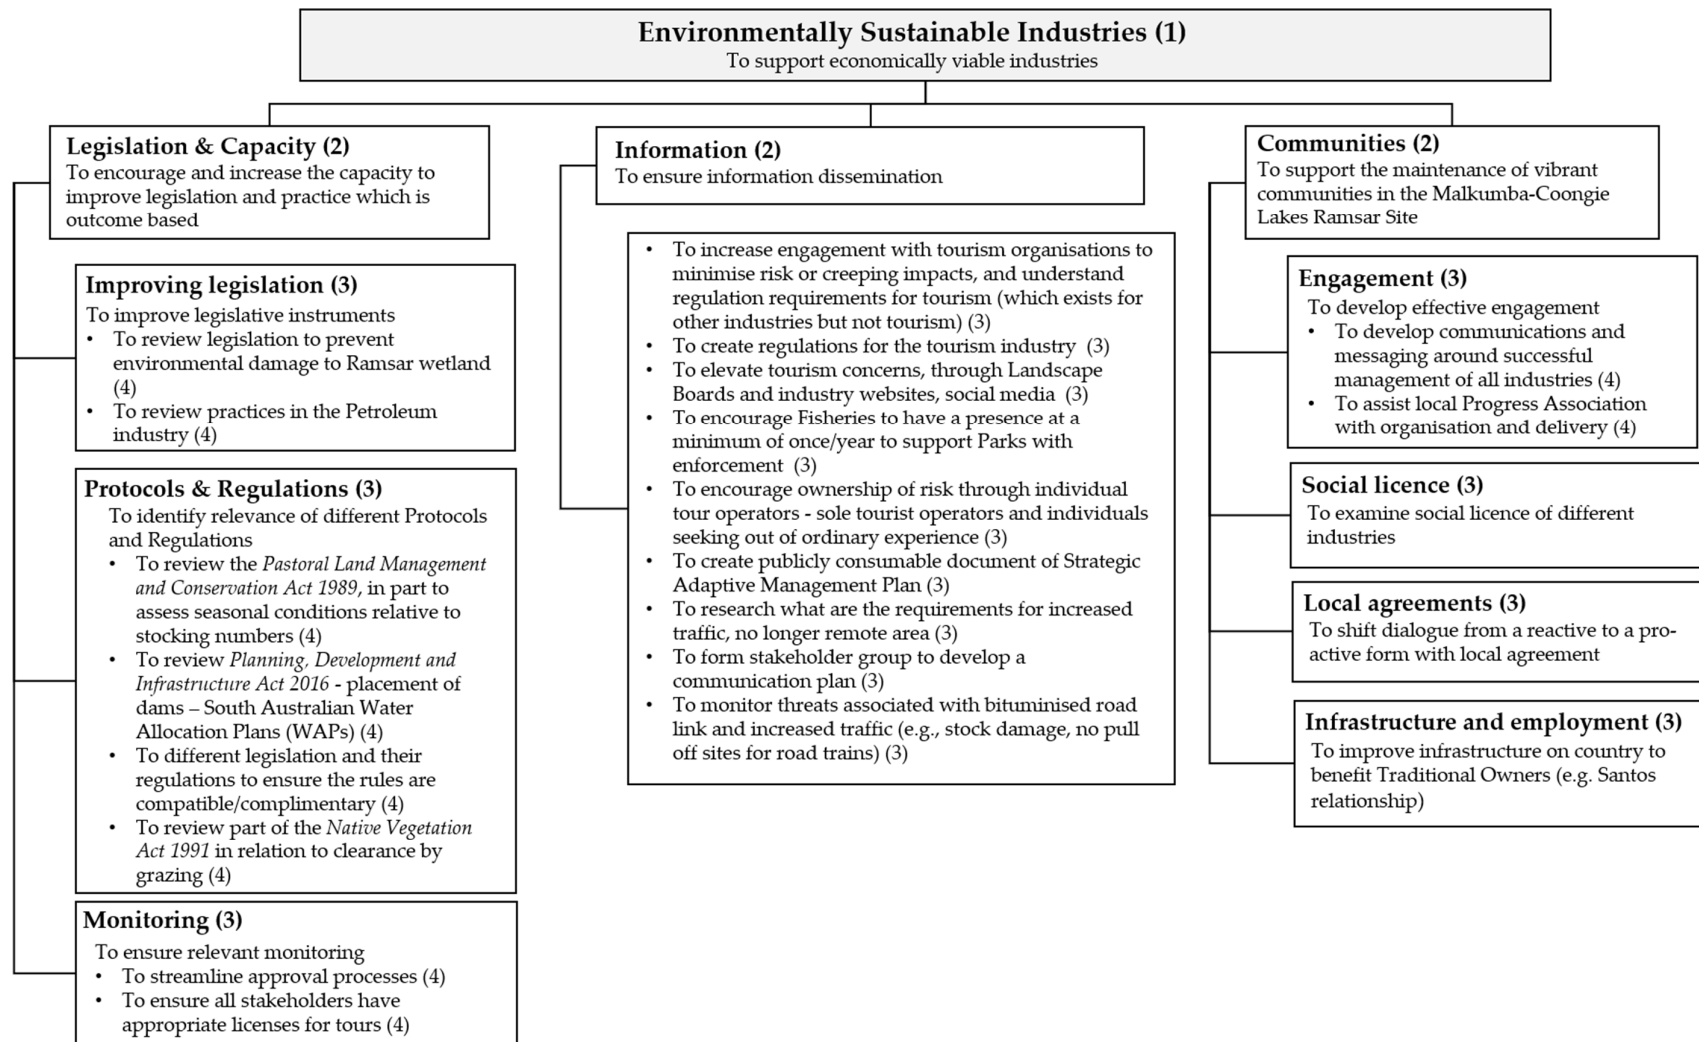

Supplementary Figure S1d. Level 1 objective (see Figure 2) for legislation, policy and management and its subsidiary Levels 2–4 objectives.

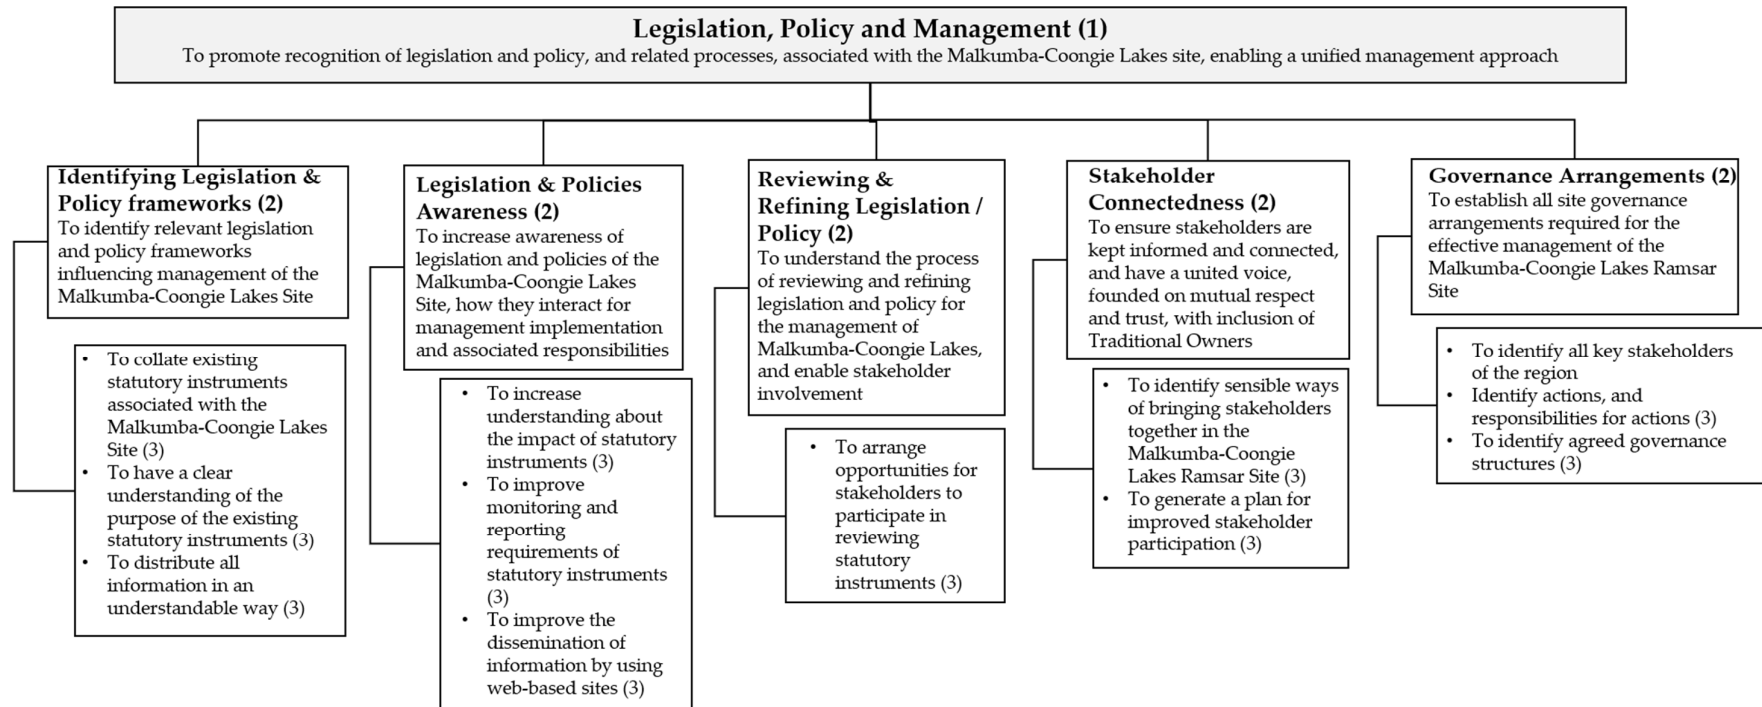

Supplementary Figure S1e. Level 1 objective (see Figure 2) for social and its subsidiary Levels 2–4 objectives.

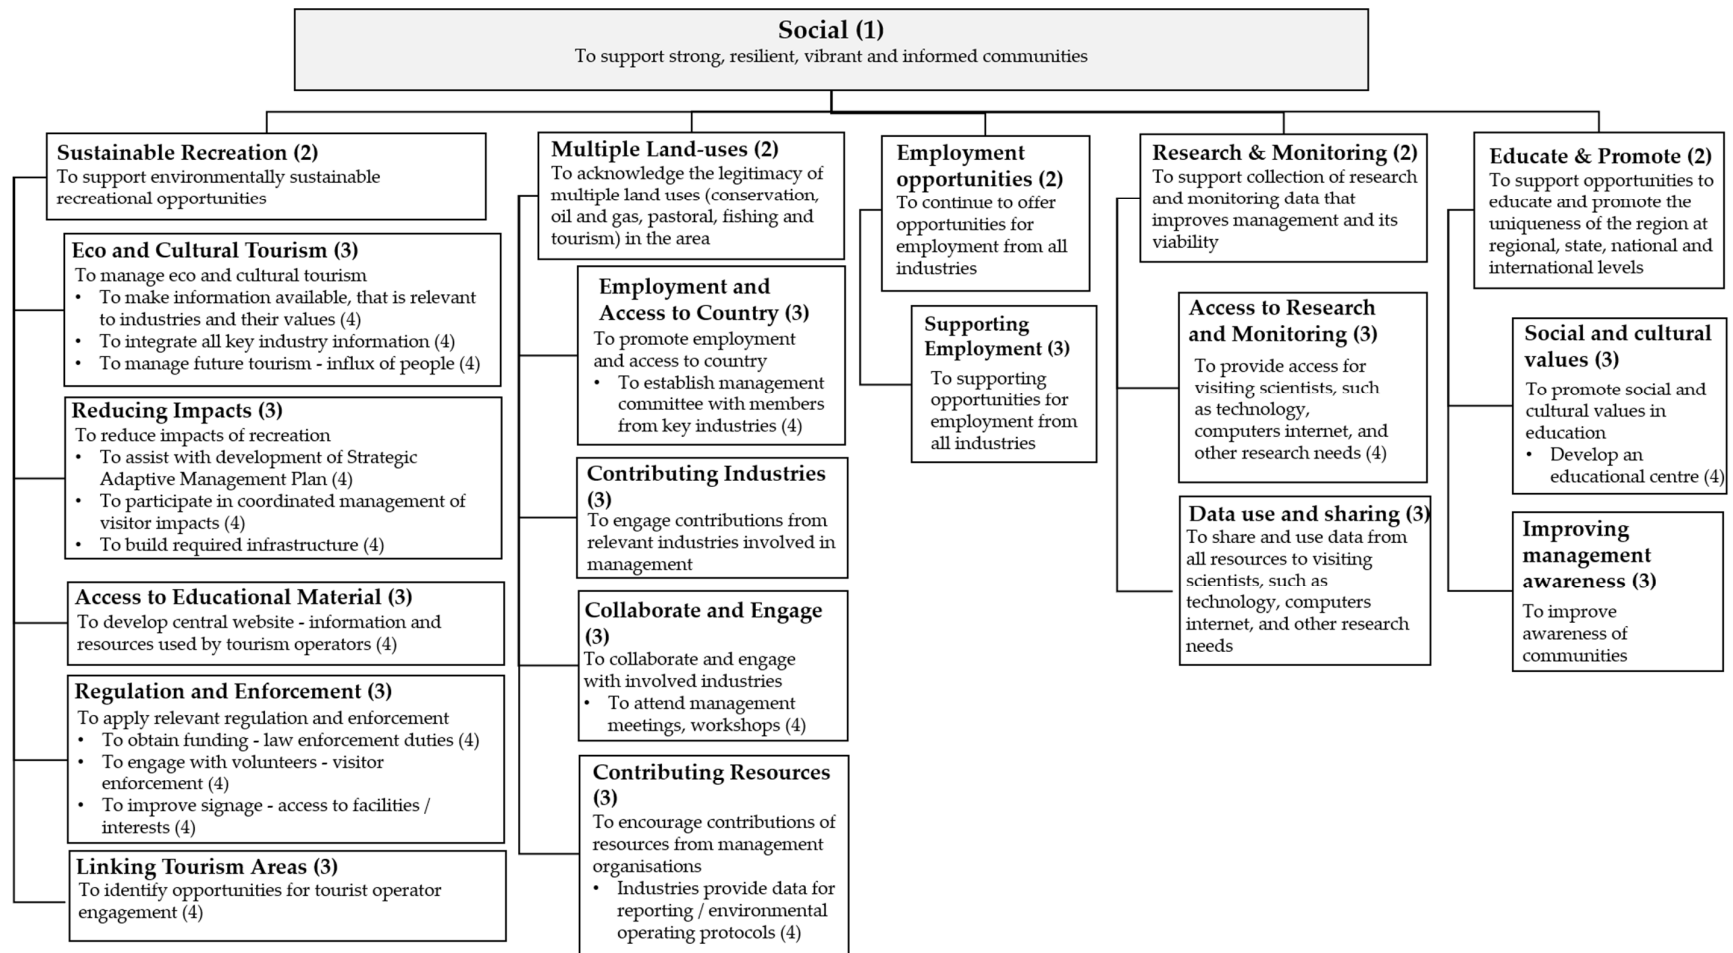

Supplement: s1 [file s1]
